# Supplementary material for: AGO1 and HSP90 buffer different genetic variants in Arabidopsis thaliana
Source: bioRxiv or medRxiv preprint supplement (doi:10.1101/2022.06.27.497824), 2022-09-30

### STAIRS9448

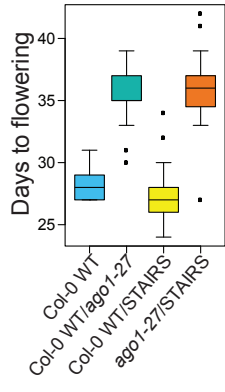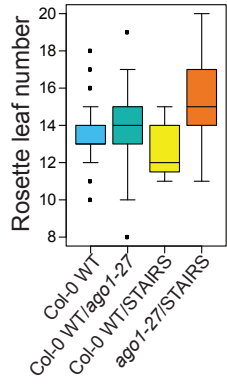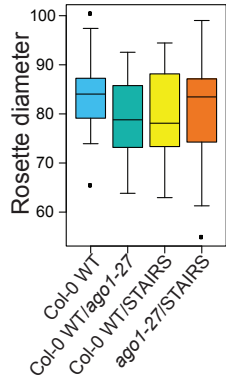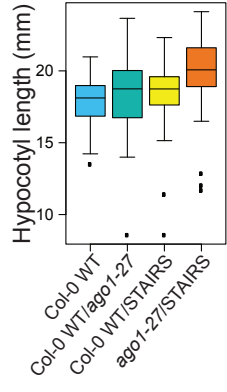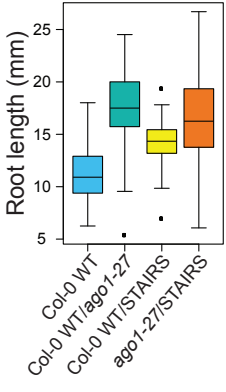

### STAIRS9459

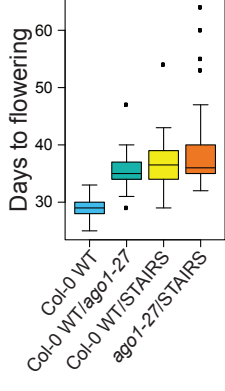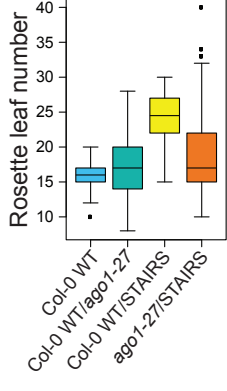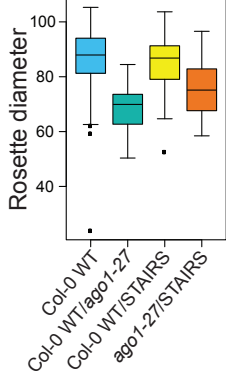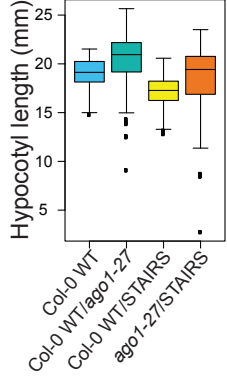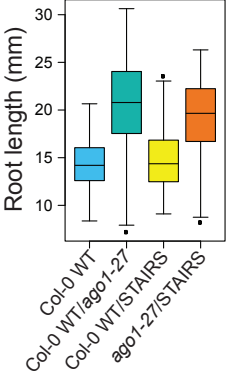

### STAIRS9472

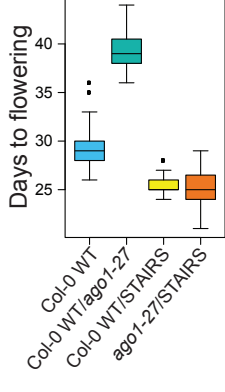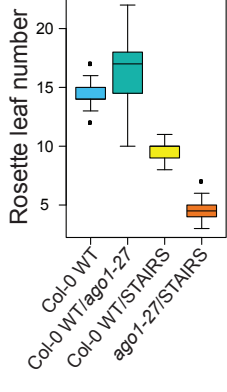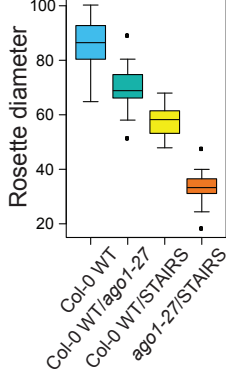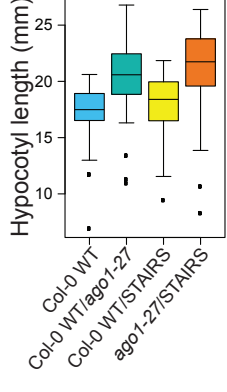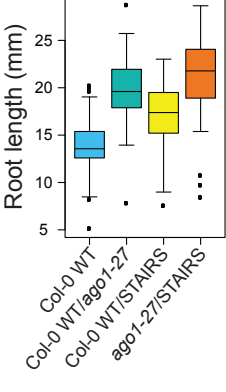

### STAIRS9501

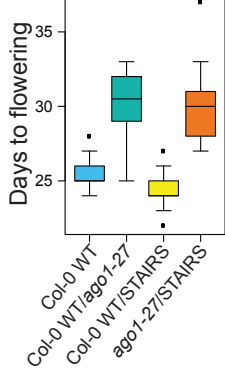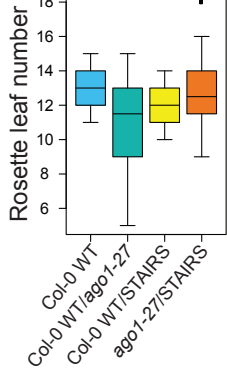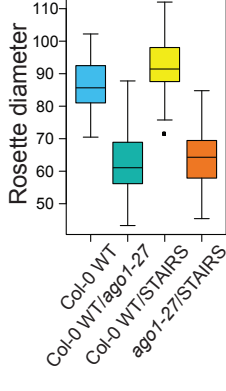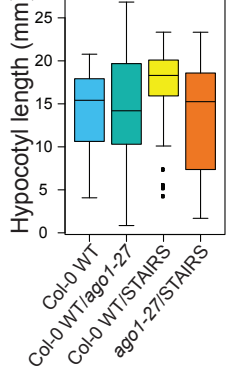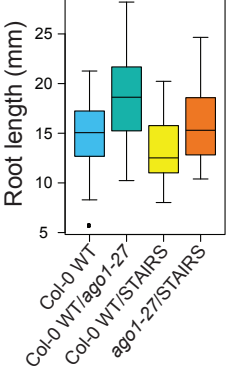

Supplement: Supplementary file [file media-1.pdf]
